# Supplementary material for: The role of terminations and coordination atoms on the pseudocapacitance of titanium carbonitride monolayers
Source: Royal Society of Chemistry journal article supplement (doi:10.1039/c5cp06986f), 2016-01-01
Supplement: c5cp06986f1.pdf [file c5cp06986f1.pdf]

## Supplementary Information

### **Role of Terminations and Coordination atoms on the pseudocapacitance of $\text{Ti}_3\text{CN}$ monolayer**

Wenqiang Zhang, Chuan Cheng, Peilin Fang, Bin Tang, Jindou Zhang, Guoming Huang, Xin

Cong, Bao Zhang, Xiao Ji\*, Ling Miao

*School of Optical and Electronic Information, Huazhong University of Science and Technology,*

*Wuhan, Hubei, 430074, People's Republic of China.*

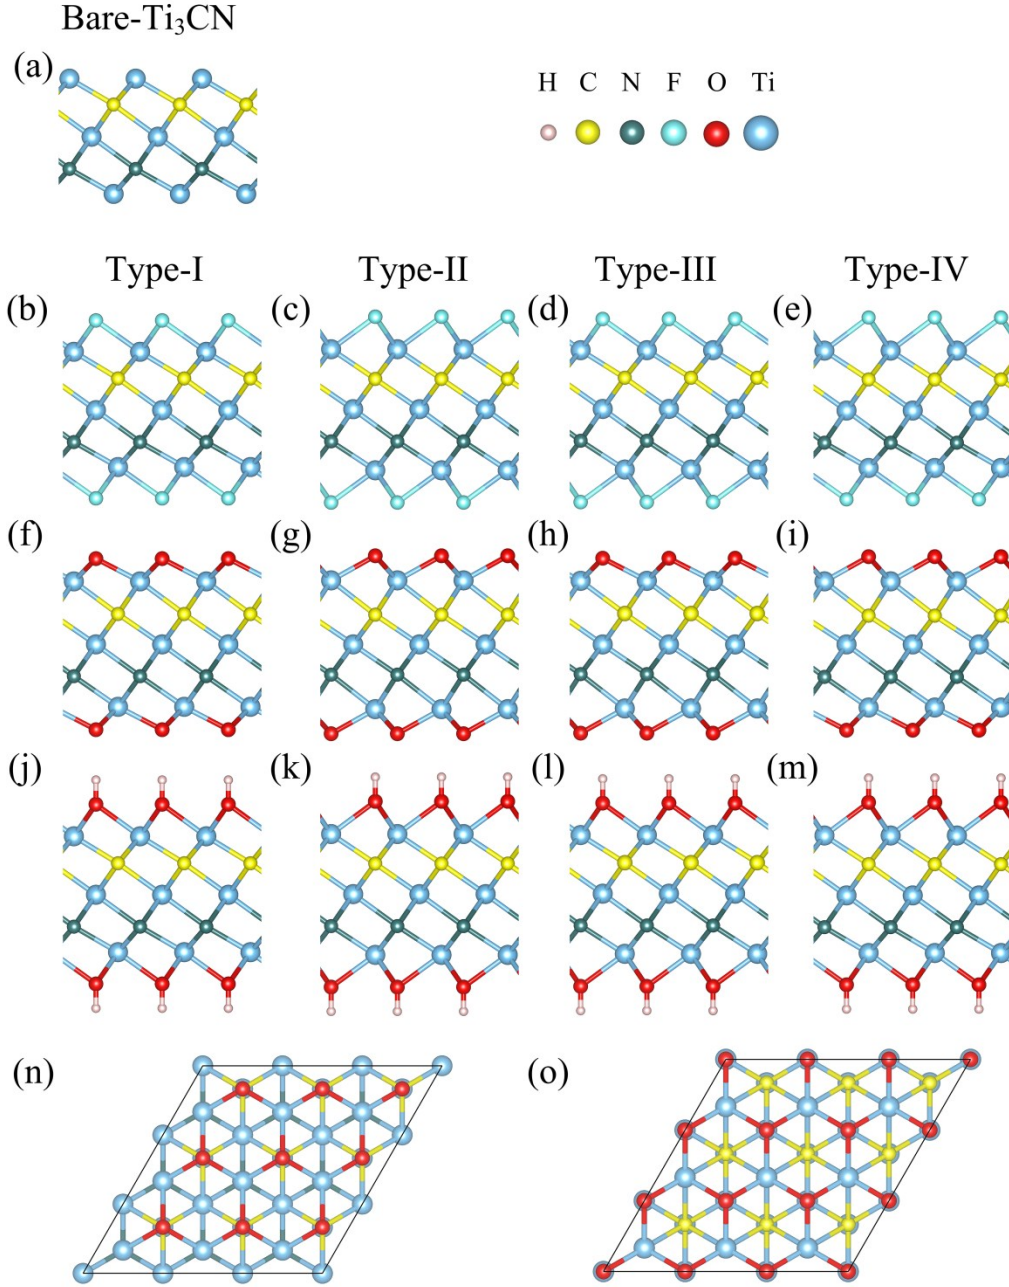

**Fig S1** A schematic showing the possible crystal structures of (a) Ti<sub>3</sub>CN (b)-(e) type I-IV Ti<sub>3</sub>CNF<sub>2</sub>, (f)-(i) type I-IV Ti<sub>3</sub>CNO<sub>2</sub>, (j)-(m) type I-IV Ti<sub>3</sub>CN(OH)<sub>2</sub> monolayer with side view. The top view of I-Ti<sub>3</sub>CNO<sub>2</sub>/ III-Ti<sub>3</sub>CNO<sub>2</sub> (n) and II-Ti<sub>3</sub>CNO<sub>2</sub>/ IV-Ti<sub>3</sub>CNO<sub>2</sub> (o) in which the O groups are located above the hollow sites pointing to the C/N and Ti(2) atoms, respectively. III-Ti<sub>3</sub>CNO<sub>2</sub> and IV-Ti<sub>3</sub>CNO<sub>2</sub> are assorted configurations of I-Ti<sub>3</sub>CNO<sub>2</sub>, and II-Ti<sub>3</sub>CNO<sub>2</sub>, in which the O groups are located above the hollow sites pointing to the C/N atoms on one side and the Ti(2) atoms on the other side. The top views of the Ti<sub>3</sub>CNF<sub>2</sub> and Ti<sub>3</sub>CN(OH)<sub>2</sub> monolayer are similar with that of the Ti<sub>3</sub>CNO<sub>2</sub> monolayer.

In order to ascertain the stability of four different  $\text{Ti}_3\text{CNT}_2$  configurations in the experiments, the formation energy, defined as the difference of total energy of the  $\text{Ti}_3\text{CNT}_2$  monolayer and the sum of the total energy of the isolated  $\text{Ti}_3\text{CN}$  monolayer and the isolated  $\text{T}_2$  gas, is calculated by the following equation <sup>1</sup>:

$$\Delta E = -[E_{\text{tot}}(\text{Ti}_3\text{CNT}_2) - E_{\text{tot}}(\text{Ti}_3\text{CN}) - E(\text{T}_2)]$$

Where  $E_{\text{tot}}(\text{Ti}_3\text{CNT}_2)$ ,  $E_{\text{tot}}(\text{Ti}_3\text{CN})$  and  $E(\text{T}_2)$  are the total energies of terminations adsorbed  $\text{Ti}_3\text{CN}$ , isolated bare  $\text{Ti}_3\text{CN}$  and the total energy of  $\text{T}_2$  ( $\text{T} = \text{F}$  or  $\text{O}$ ) gas, respectively. As for the  $\text{Ti}_3\text{CN}(\text{OH})_2$  monolayer,  $E(\text{T}_2)$  is the sum of the total energy of  $\text{O}_2$  and  $\text{H}_2$  gas. The results of calculated formation energies are summarized in Table S1. According to the definition of the formation energy, the larger value is, the stronger interaction between the transition metal atom and the attached chemical group shows.

**Table S1** The lengths of  $\text{Ti}(1)\text{-C}$ ,  $\text{Ti}(2)\text{-N}$ ,  $\text{Ti}(1)\text{-T}$ ,  $\text{Ti}(2)\text{-T}$  ( $\text{T} = \text{F}$ ,  $\text{O}$  or  $\text{OH}$ ) bond in  $\text{Ti}_3\text{CN}$ ,  $\text{Ti}_3\text{CNF}_2$ ,  $\text{Ti}_3\text{CNO}_2$ ,  $\text{Ti}_3\text{CN}(\text{OH})_2$  monolayer and relative formation energies. The units of distance and energy are angstrom ( $\text{\AA}$ ) and eV, respectively.

| System                         | $\text{Ti}(1)\text{-C/ \AA}$ | $\text{Ti}(2)\text{-N/ \AA}$ | $\text{Ti}(1)\text{-T/ \AA}$ | $\text{Ti}(2)\text{-T/ \AA}$ | $\Delta E/ \text{eV}$ |
|--------------------------------|------------------------------|------------------------------|------------------------------|------------------------------|-----------------------|
| $\text{Ti}_3\text{CN}$         | 2.06                         | 2.04                         | ---                          | ---                          | ---                   |
| I- $\text{Ti}_3\text{CNF}_2$   | 2.07                         | 2.04                         | 2.17                         | 2.17                         | -10.62                |
| II- $\text{Ti}_3\text{CNF}_2$  | 2.14                         | 2.12                         | 2.20                         | 2.20                         | -10.04                |
| III- $\text{Ti}_3\text{CNF}_2$ | 2.09                         | 2.12                         | 2.17                         | 2.20                         | -10.34                |
| IV- $\text{Ti}_3\text{CNF}_2$  | 2.12                         | 2.04                         | 2.21                         | 2.17                         | -10.21                |
| I- $\text{Ti}_3\text{CNO}_2$   | 2.20                         | 2.16                         | 1.99                         | 1.99                         | -10.93                |

|                                         |      |      |      |      |        |
|-----------------------------------------|------|------|------|------|--------|
| II-Ti <sub>3</sub> CNO <sub>2</sub>     | 2.24 | 2.25 | 2.03 | 2.03 | -9.45  |
| III-Ti <sub>3</sub> CNO <sub>2</sub>    | 2.20 | 2.24 | 1.99 | 2.03 | -10.22 |
| IV-Ti <sub>3</sub> CNO <sub>2</sub>     | 2.24 | 2.16 | 2.03 | 1.99 | -10.21 |
| I-Ti <sub>3</sub> CN(OH) <sub>2</sub>   | 2.08 | 2.05 | 2.19 | 2.19 | -10.46 |
| II-Ti <sub>3</sub> CN(OH) <sub>2</sub>  | 2.13 | 2.12 | 2.20 | 2.20 | -10.17 |
| III-Ti <sub>3</sub> CN(OH) <sub>2</sub> | 2.09 | 2.10 | 2.19 | 2.20 | -10.34 |
| IV-Ti <sub>3</sub> CN(OH) <sub>2</sub>  | 2.11 | 2.05 | 2.21 | 2.17 | -10.21 |

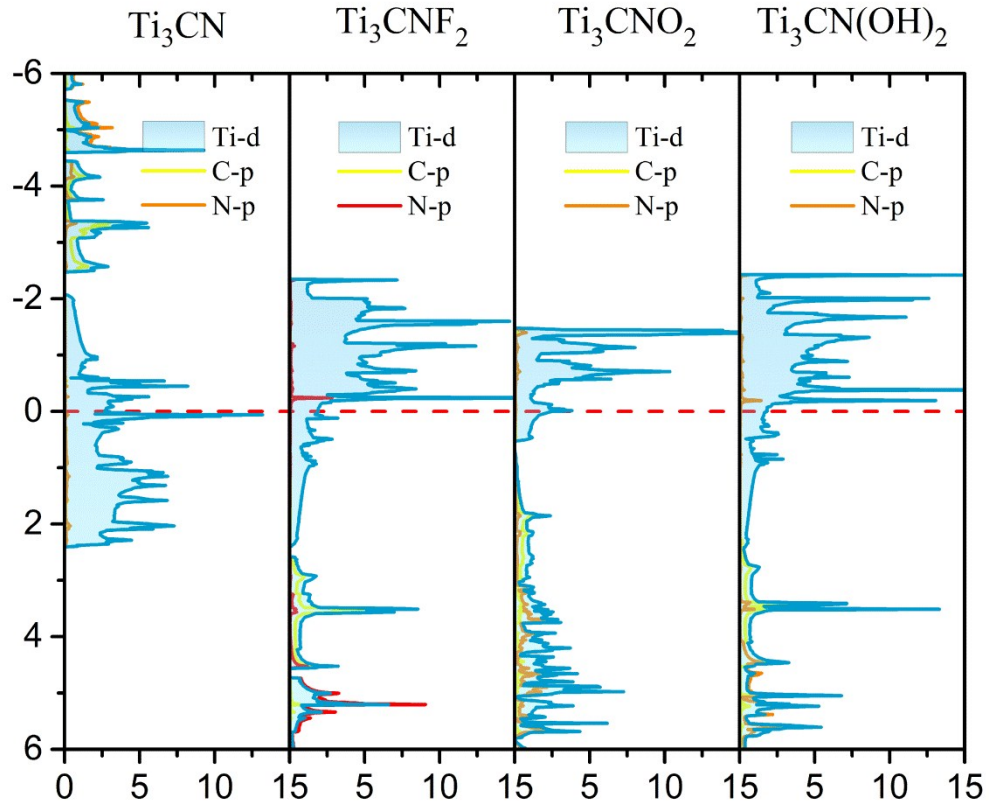

**Fig S2** Calculated PDOS near the Fermi level 0 V (a) Ti<sub>3</sub>CN, (b) Ti<sub>3</sub>CNO<sub>2</sub>, (c) Ti<sub>3</sub>CNF<sub>2</sub> and (d) Ti<sub>3</sub>CN(OH)<sub>2</sub>.

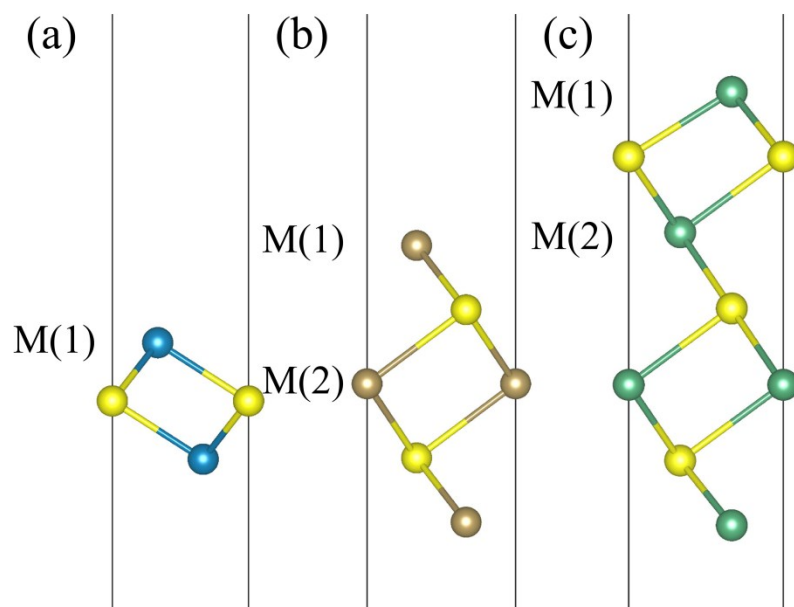

**Figure S3:** The atomic diagrams show the MXenes with three, five and seven layers: (a) Three-layer MXenes ( $\text{Cr}_2\text{C}$  and  $\text{Cr}_2\text{N}$ ), (b) Five-layer MXenes ( $\text{Ta}_3\text{C}_2$ ,  $\text{Ti}_3\text{C}_2$  and  $\text{Ti}_3\text{N}_2$ ) and (c) Seven-layer MXenes ( $\text{Ta}_4\text{C}_3$ ,  $\text{Nb}_4\text{C}_3$ ).

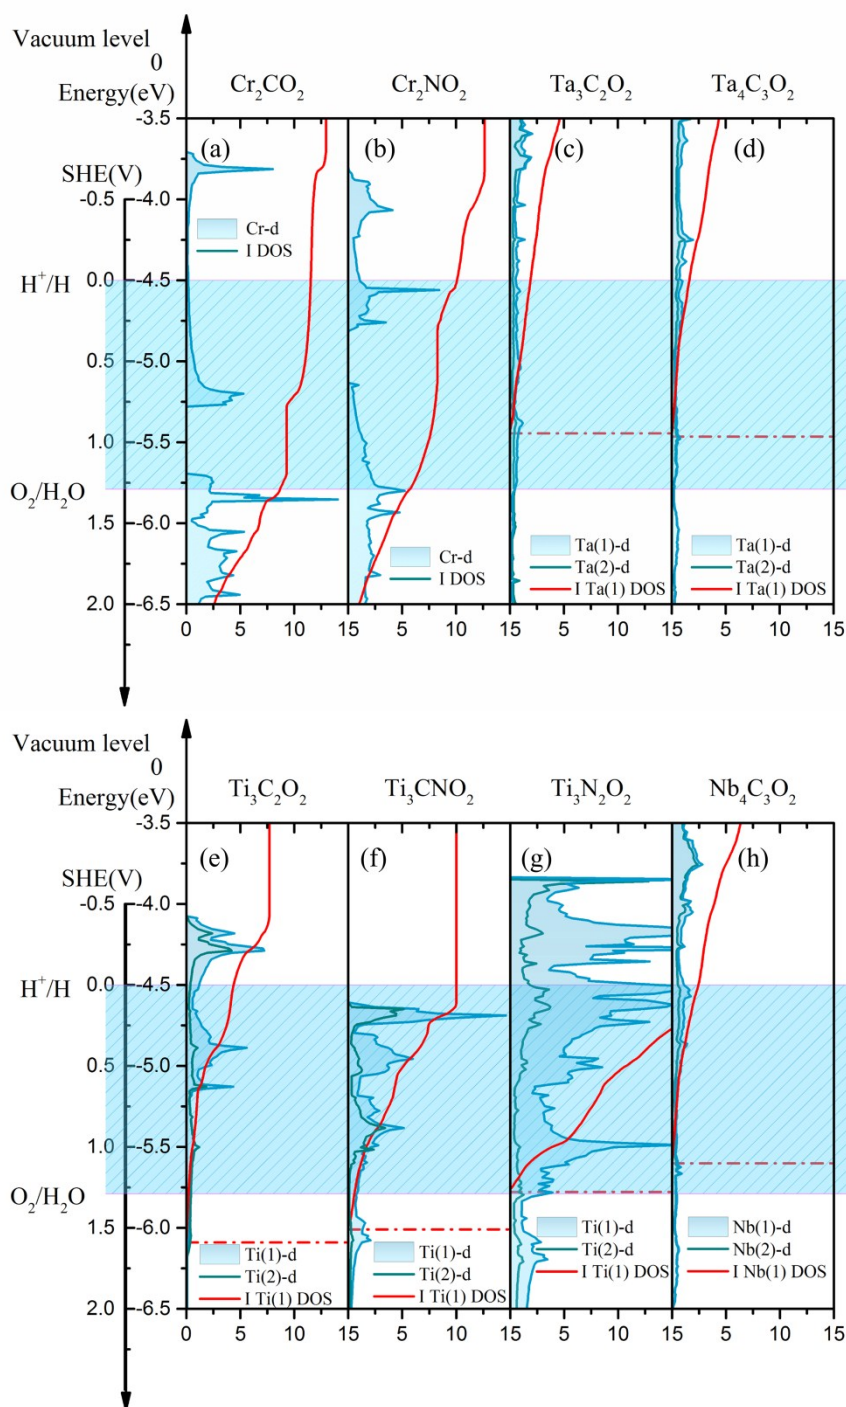

**Figure S4:** Relative PDOS and integral DOS of the *d*-orbitals of M (M = Cr, Ta, Ti or Nb) atoms referenced to SHE. The M(1) and M(2) are in the coordination environment of 3C/N-M(1)-3O and 3C/N-M(2)-3C/N, respectively. The blue region and cyan line represent the PDOS of M(1) and M(2), and the red line indicates the integral DOS of the *d*-orbitals of Ti(1) atoms aligned to SHE.

**Table S2:** The total energies of pure and different mixed  $\text{Ti}_3\text{CN}$  configurations. The I configuration represents the  $\text{Ti}_3\text{CN}$  monolayer with pure layers, while the II and III configurations indicate the C/N ratios of the mixed C/N layers are 1:3/3:1 and 2:2/2:2, respectively.

| Configurations   | I       | II      | III     |
|------------------|---------|---------|---------|
| Total energy(eV) | -176.88 | -177.07 | -177.13 |

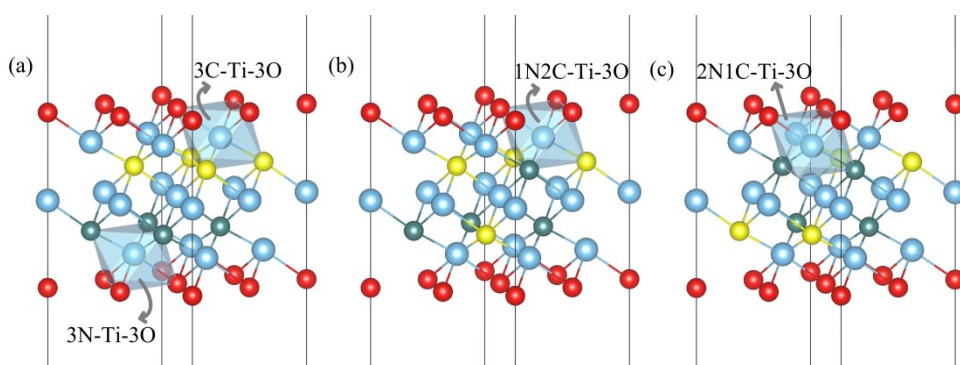

**Figure S5** (a) The  $\text{Ti}_3\text{CNO}_2$  monolayer with pure layers: the Ti atom is coordinated by 3 C atoms and 3 O atoms (3C-Ti-3O) or by 3 N atoms and 3 O atoms (3N-Ti-3O), (b) The  $\text{Ti}_3\text{CNO}_2$  monolayer with mixed layers (C/N=1:3 or 3:1): the Ti atom is coordinated by 1 N atom, 2 C atoms and 3 O atoms (1N2C-Ti-3O), (c) The  $\text{Ti}_3\text{CNO}_2$  monolayer with mixed layers (C/N=2:2): the Ti atom is coordinated by 2 N atoms, 1 C atom and 3 O atoms (2N1C-Ti-3O).

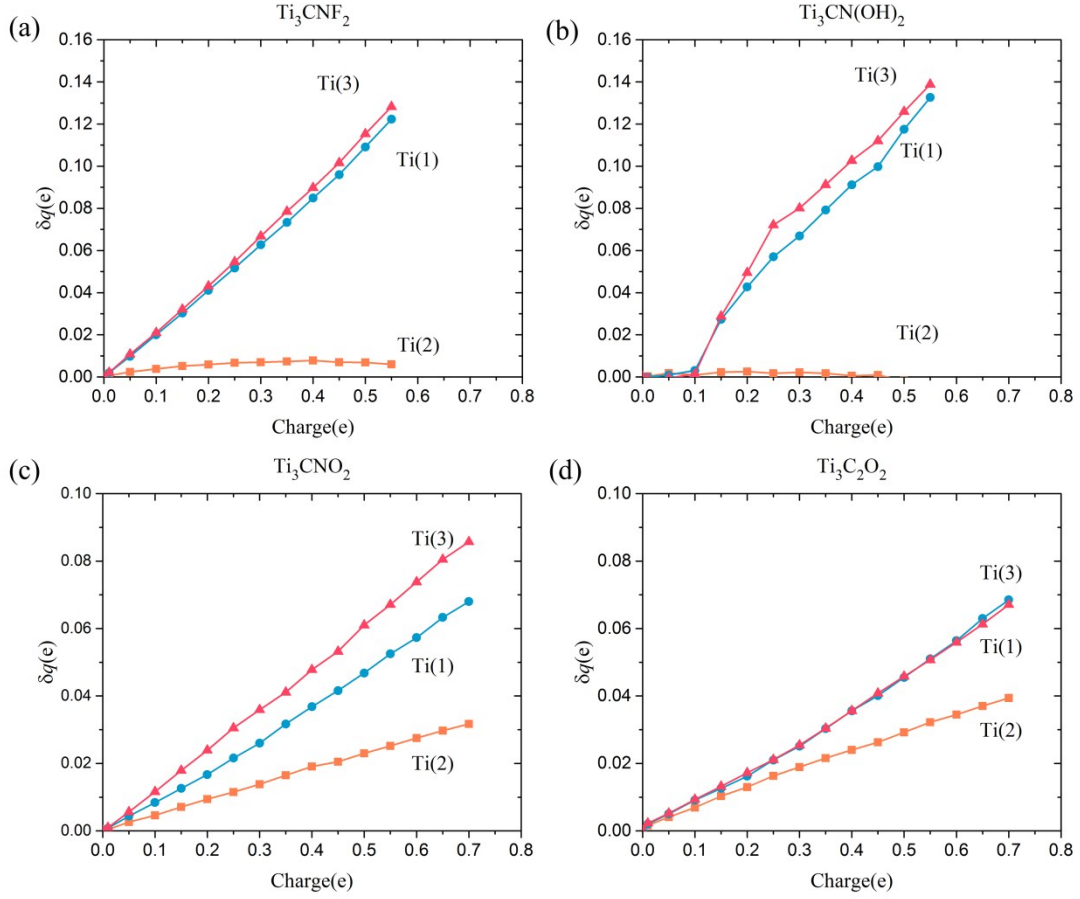

**Figure S6** The accessory electrons of Ti atoms in (a)  $\text{Ti}_3\text{CNF}_2$ , (b)  $\text{Ti}_3\text{CN(OH)}_2$ , (c)  $\text{Ti}_3\text{CNO}_2$  and (d)  $\text{Ti}_3\text{C}_2\text{O}_2$  monolayer when charging the system with electrons.

## The details of the relation of Fermi level and electron charge

Following the theoretical calculation,<sup>2</sup> the states-filling energy can be view as

$$W_{\text{filling}} = \int_{\varepsilon_{\text{fermi}}}^{\varepsilon'} \varepsilon D(\varepsilon) d\varepsilon ,$$

where  $\varepsilon$  is the Kohn-Sham (KS) energy,  $\varepsilon_{\text{fermi}}$  is the Fermi level and  $D(\varepsilon)$  is the density of states.  $\varepsilon'$  satisfies the charge-conservation criterion:

$$\int_{\varepsilon_{\text{fermi}}}^{\varepsilon'} D(\varepsilon) d\varepsilon = \delta q ,$$

where  $\delta q$  is the charge electrons.

It can be indicated that when the Fermi level is higher, the  $W_{\text{filling}}$  will become bigger, in other words, the electrons may become harder to charged. To evaluate the electron

charge, the similar Fermi level is needed.

In the mixed system ( $\text{Ti}_3\text{CNT}_x$ ), the O terminated Ti atoms would obtain electron easier than the F terminated Ti atoms since the Fermi level of  $\text{Ti}_3\text{CNO}_2$  (-6.01 eV referenced to vacuum level) is lower than  $\text{Ti}_3\text{CNF}_2$  (-4.91 eV referenced to vacuum level). When the Fermi level is higher than -4.5 eV,<sup>3, 4</sup> the relative system may cannot obtain the electrons due to the redox reaction of  $\text{H}^+/\text{H}_2$ . Thus, the  $\text{Ti}_3\text{CN}(\text{OH})_2$  (-1.82 eV referenced to vacuum level) may cannot be charged in the mixed system. The similar Fermi levels of  $\text{Ti}_3\text{CNO}_2$  (-6.01 eV referenced to vacuum level) and  $\text{Ti}_3\text{C}_2\text{O}_2$  (-6.09 eV referenced to vacuum level) bring convenience to compare the charge storage of Ti atoms in  $\text{Ti}_3\text{CNO}_2$  and  $\text{Ti}_3\text{C}_2\text{O}_2$ .

The similar Fermi levels of  $\text{Ti}_3\text{CNO}_2$  (-6.01 eV referenced to vacuum level) and  $\text{Ti}_3\text{C}_2\text{O}_2$  (-6.09 eV referenced to vacuum level) bring convenience to compare the charge storage of Ti atoms in  $\text{Ti}_3\text{CNO}_2$  and  $\text{Ti}_3\text{C}_2\text{O}_2$ .

## **The details of the relation of the dipole moments and work function**

Following the theoretical method developed by Leung,<sup>5</sup> the electron charge transfer [ $\Delta\rho$ ] between the adsorbates and the substrate is defined as

$$\Delta\rho(z) = \rho(z) - [\rho_s(z) + \rho_t(z)],$$

where  $\rho(z)$ ,  $\rho_s(z)$  and  $\rho_t(z)$  are the total charge densities of the functionalized system, the substrate, and the termination, respectively. Computationally,  $\Delta\rho$  is generated from a total energy calculation of the substrate by removing the overlayer of terminations from the functionalized  $\text{Ti}_3\text{CN}$  without the structural optimization. Similarly,  $\rho_t(z)$  is obtained from a total energy calculation of the termination layer by removing the substrate from the functionalized  $\text{Ti}_3\text{CN}$ . Thereby, the surface dipole moments induced by charge rearrangement can be expressed by

$$\Delta p(z) = \int_{z_0}^z z \Delta \rho(z) dz ,$$

where  $z_0$  is the center of substrate (Ti<sub>3</sub>CN monolayer). Then, we get

$$\Delta p = p - (p_s + p_t)$$

where  $p_s$  is the surface dipole density of the Ti<sub>3</sub>CN substrate and  $p_t$  is the surface dipole density of the free-standing termination layer. Due to the symmetry of the charge density of the freestanding overlayer,  $\rho_t$  is equal to zero. Thereby, the change in the total dipole moment ( $\Delta P$ ) by functionalization can be expressed as

$$\Delta P = p - p_0 = \Delta p + p_s + p_t - p_0 ,$$

Then, the change of the work function induced by the terminations is given by the following expression:

$$\Delta \phi = -\frac{e}{\epsilon_0} \Delta P = -\frac{e}{\epsilon_0} [\Delta p + (p_s - p_0)] .$$

Therefore,  $\Delta \phi$  is affected by the dipole moment of the transferred charges ( $\Delta p$ ) between the substrate and the termination, and the change in the dipole moments due to substrate relaxation ( $p_s - p_0$ ). The contribution of the structure relaxation is usually smaller than that of the charge rearrangement <sup>5</sup>. However, in OH terminated MXenes, the contribution of the structure relaxation cannot be ignored <sup>6</sup>.

## References

1. M. Khazaei, M. Arai, T. Sasaki, C.-Y. Chung, N. S. Venkataramanan, M. Estili, Y. Sakka and Y. Kawazoe, *Advanced Functional Materials*, 2013, **23**, 2185-2192.
2. Y. Liu, Y. M. Wang, B. I. Yakobson and B. C. Wood, *Physical review letters*,

- 2014, **113**, 028304.
3. S. Morishita and K.-i. Suzuki, *Bulletin of the Chemical Society of Japan*, 1994, **67**, 843-846.
  4. S. Licht, A. J. Bard and M. Stratmann, Semiconductor electrodes and Photoelectrochemistry, *Encyclopedia of Electrochemistry*, vol. 6, 2002.
  5. T. C. Leung, C. L. Kao, W. S. Su, Y. J. Feng and C. T. Chan, *Physical Review B*, 2003, **68**.
  6. W. Li, Y. Yang, G. Zhang and Y. W. Zhang, *Nano Lett*, 2015, **15**, 1691-1697.
